# Supplementary material for: Ozone-mediated synthesis of ceria nanoparticles
Source: Royal Society of Chemistry journal article supplement (doi:10.1039/c8nr01971a), 2018-01-01
Supplement: c8nr01971a1.pdf [file c8nr01971a1.pdf]

## Electronic Supporting Information

### Ozone-mediated synthesis of ceria nanoparticles

Anuja Bhalkikar,<sup>a</sup> Tai-Sing Wu,<sup>b</sup> Chris M. Marin,<sup>a</sup> Tamra. J. Fisher,<sup>a</sup> Meiyu Wang,<sup>c</sup> Isaac H. Wells,<sup>a</sup> Anandakumar Sarella,<sup>d</sup> Yun-Liang Soo,<sup>b, e</sup> and Chin Li Cheung<sup>a\*</sup>

a. Department of Chemistry, University of Nebraska-Lincoln, Lincoln, Nebraska 68588, United States.  
Email: [ccheung2@unl.edu](mailto:ccheung2@unl.edu)

b. National Tsing Hua University, Hsinchu 30013, Taiwan, R.O.C.

c. Department of Mechanical and Materials Engineering, University of Nebraska-Lincoln, Lincoln, Nebraska 68588, United States.

d. Nebraska Center for Materials and Nanoscience, University of Nebraska-Lincoln, Lincoln, Nebraska 68588, United States.

e. National Synchrotron Radiation Research Centre, Hsinchu 30076, Taiwan, R.O.C.

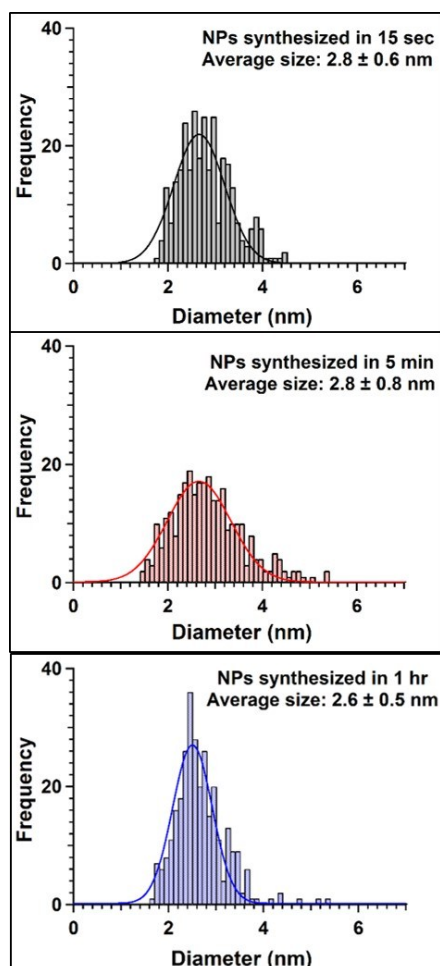

**Fig. S1** Average size distributions of ceria NPs synthesized from cerium (III) nitrate in ethanol with different ozonation reaction times (15 sec, 5 min, and 1 h). The sizes of the nanoparticles were estimated from the size of the crystallites in the transmission electron microscopy images.

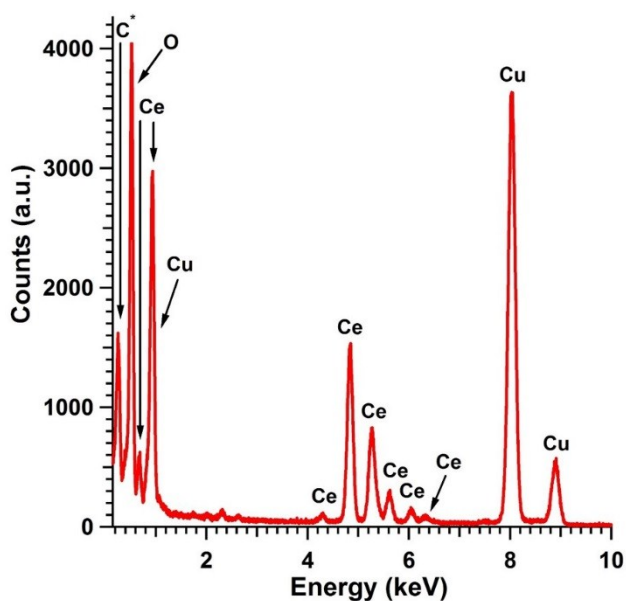

**Fig. S2** Energy dispersive X-ray spectrum of ceria NPs synthesized with one hour of ozonation.

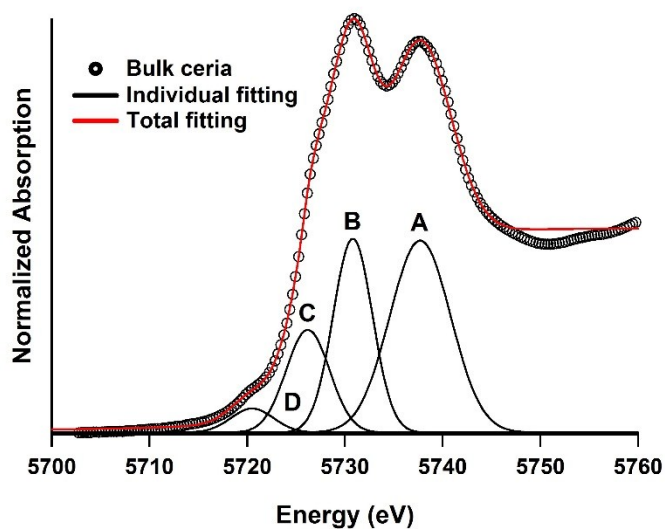

**Fig. S3** Ce  $L_3$ -edge XANES spectrum of commercial bulk ceria. Peaks A and B were attributed to the  $Ce^{4+}$  state. Peak C was ascribed to the  $Ce^{3+}$  state. Peak D was due to the final states of  $2p4f^*$ . Note:  $2p$  denotes the hole produced in  $2p^{3/2}$  and  $4f^*$  indicates the presence of an excited electron in the  $4f$  band.

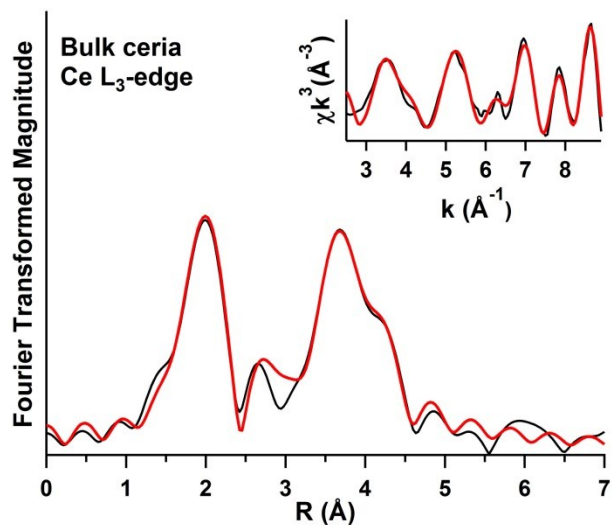

**Fig. S4** Fourier transformed Ce L<sub>3</sub>-edge EXAFS spectrum of commercial bulk ceria. (inset) Normalized data in *k*-space. (Black: data; red: fitting)

| Sample                | Atom | <i>N</i>       | <i>R</i> (Å)    | $\sigma^2$ ( $10^{-3}$ Å <sup>2</sup> ) |
|-----------------------|------|----------------|-----------------|-----------------------------------------|
| Commercial bulk ceria | O    | $7.9 \pm 0.8$  | $2.35 \pm 0.01$ | $6.2 \pm 3.9$                           |
|                       | Ce   | $12.0 \pm 0.4$ | $3.85 \pm 0.01$ | $3.2 \pm 1.6$                           |
|                       | O    | $23.6 \pm 3.0$ | $4.45 \pm 0.01$ | $14.0 \pm 5.2$                          |

**Table S1** Fitted structural parameters of the Ce L<sub>3</sub>-edge EXAFS analysis for commercial bulk ceria. *N* is the coordination number. *R* is the average bond distance.  $\sigma^2$  is the Debye-Waller factor. Underlined parameters are fixed in the fitting analysis. The fitting model for commercial bulk ceria was based on the fluorite-like CeO<sub>2</sub> crystal structure.

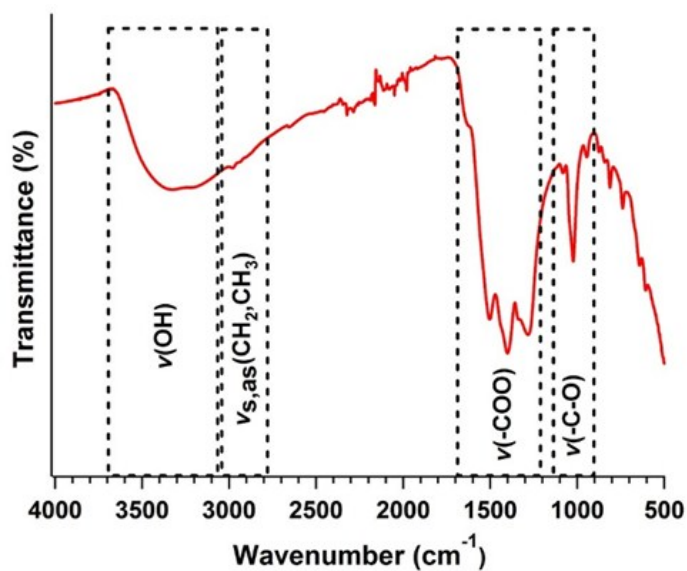

**Fig. S5** FT-IR spectrum of ceria nanoparticles synthesized with one hour of ozonation

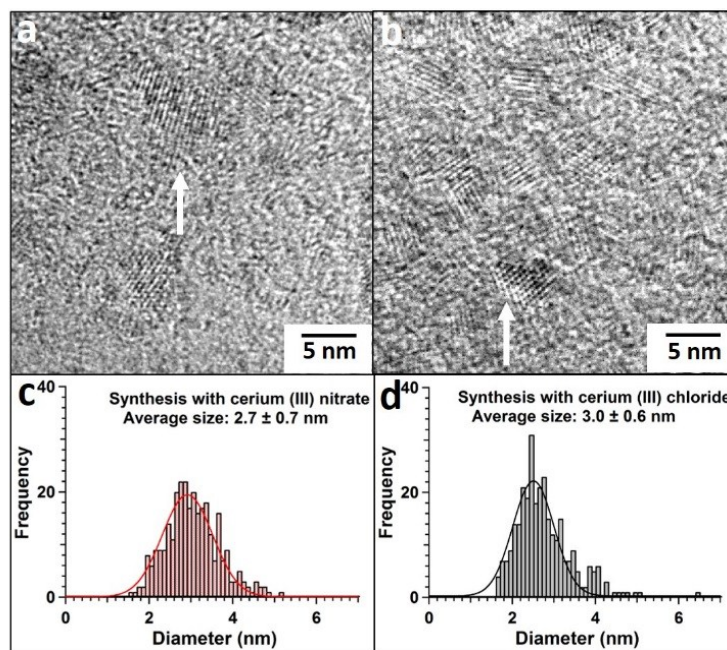

**Fig. S6** HRTEM images of ceria NPs synthesized with 30 minutes of ozonation in ethanol using (a) cerium (III) nitrate and (b) cerium (III) chloride. Corresponding size distributions (c & d) are under the images. White arrows indicate the nanoparticles.

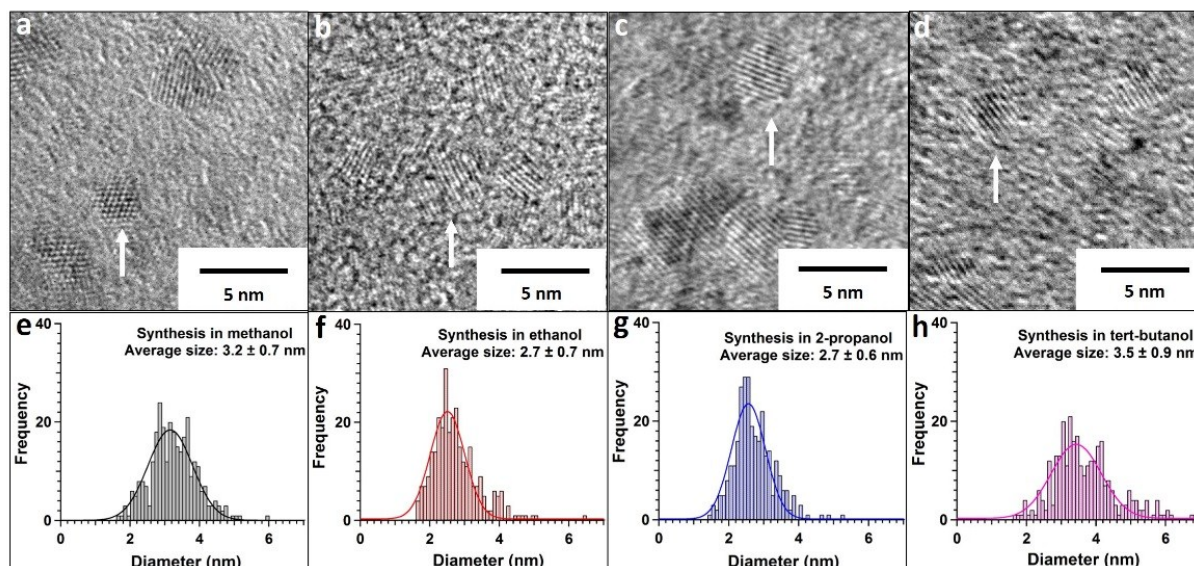

**Fig. S7** HRTEM images of ceria NPs synthesized with 30 minutes of ozonation with cerium (III) nitrate using (a) methanol, (b) ethanol, (c) 2-propanol, and (d) tert-butanol. Corresponding size distributions (e, f, g & h) are under the images. Arrows indicate the nanoparticles.

### Reaction time

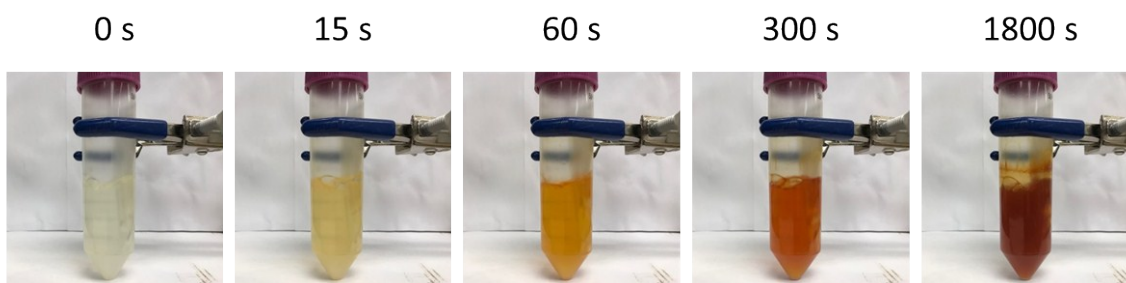

**Fig. S8** Synthesis of ceria NPs prepared by ozonating an ethanol solution of cerium (III) nitrate. (Left to right) Optical images of reaction mixtures from different reaction times: 0 s, 15 s, 60 s, 300 s and 1800 s.

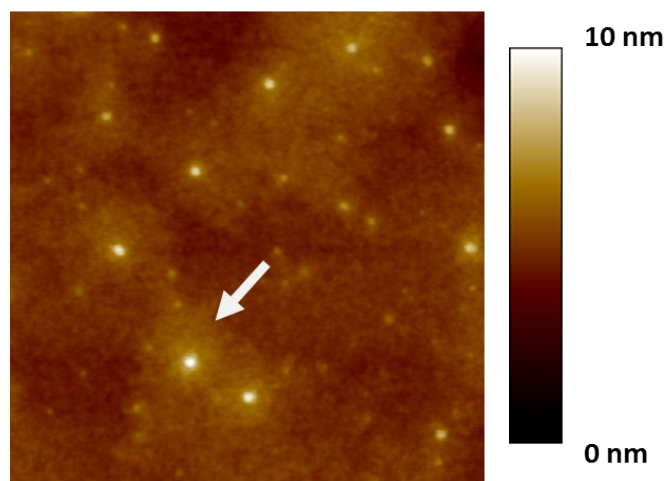

**Fig. S9** Topographic AFM image of ceria nanoparticles synthesized with 1 h of ozonation in ethanol. White arrow indicates polymer-like species encapsulating some nanoparticles. The image size is 1  $\mu\text{m}$  x 1  $\mu\text{m}$ . Note that no patches of polymer-like species were observed in control topographic AFM images of poly-*L*-lysine coated mica discs.

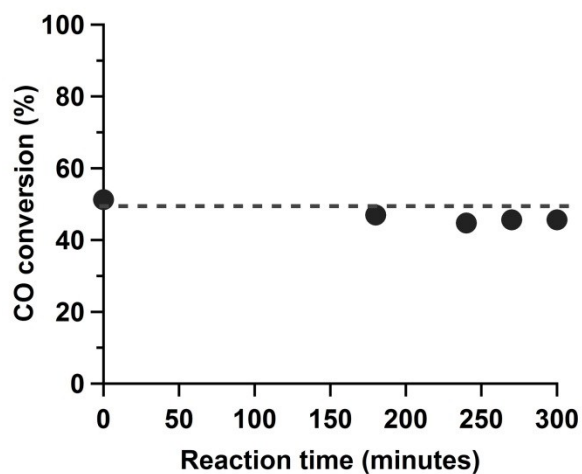

**Fig. S10** Catalytic activity of activated ceria NPs towards CO oxidation. Plot of CO conversion (%) vs. reaction time at reaction temperature of 310  $^{\circ}\text{C}$ .
